# Supplementary material
Source: MDPI journal article supplement (https://www.mdpi.com/2075-163X/11/10/1046)
Supplement: s1 [file s1]

Supplementary Material for

# Lithium Potential Mapping Using Artificial Neural Networks: A Case Study from Central Portugal

Martin Köhler <sup>1,\*</sup>, Delira Hanelli <sup>1</sup>, Stefan Schaefer <sup>1</sup>, Andreas Barth <sup>1</sup>, Andreas Knobloch <sup>1</sup>, Peggy Hielscher <sup>1</sup>, Joana Cardoso-Fernandes <sup>2,3</sup>, Alexandre Lima <sup>2,3</sup> and Ana C. Teodoro <sup>2,3</sup>

Supplemental Figure S1

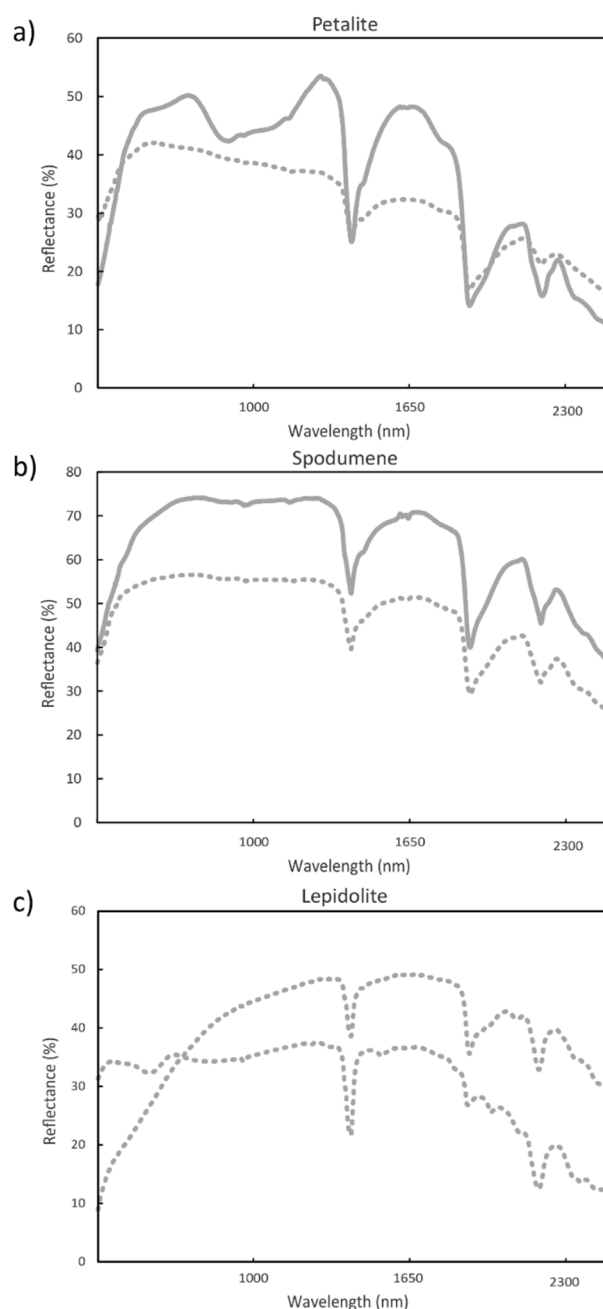

**Figure S1.** Reference spectral signatures of (a) petalite samples from Bajoca mine, (b) spodumene samples from the Alberto mine, and (c) lepidolite samples from the Feli mines [45]. Dotted curves correspond to fresh samples. Full curves represent weathered samples.

## Supplemental Figure S2

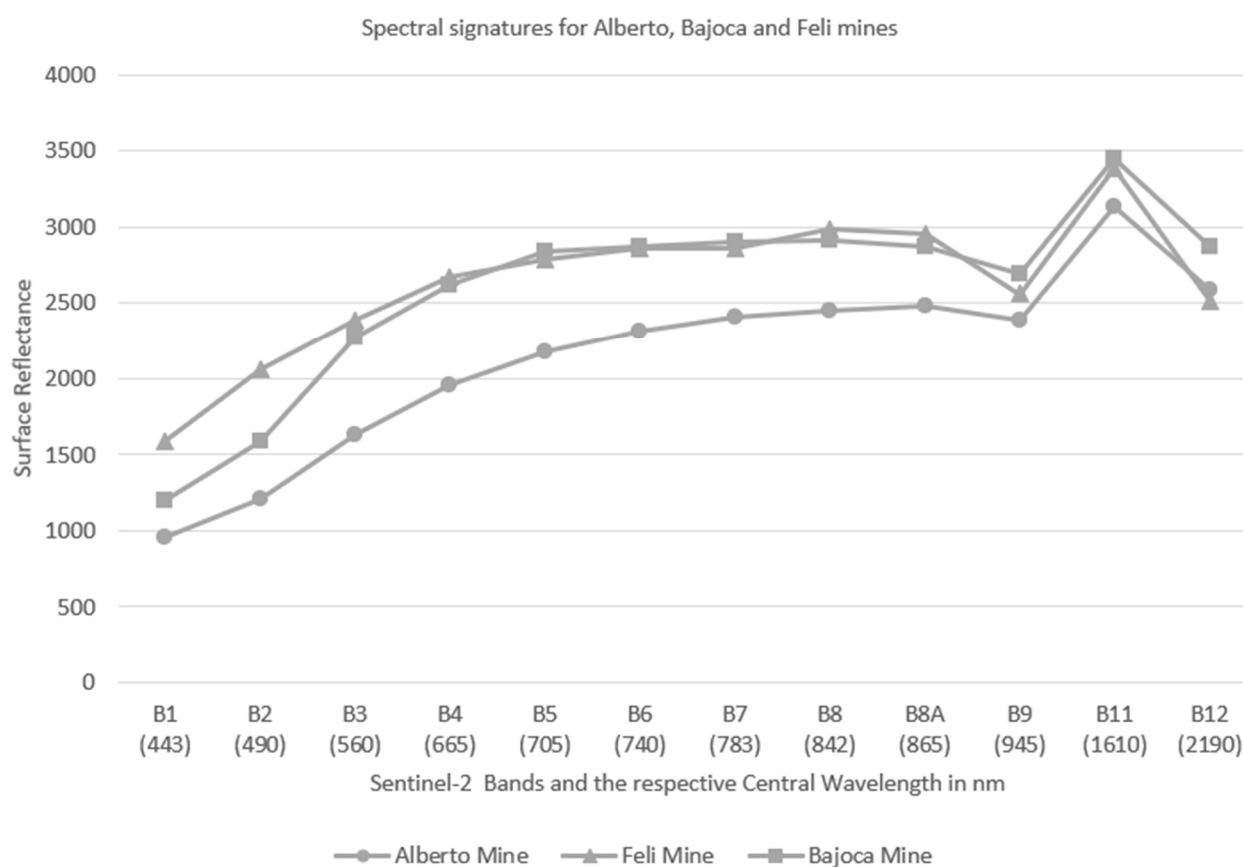

**Figure S2.** Spectral signatures for Alberto, Bajoca and Feli mines based on Sentinel-2 data.

## Supplemental Figure S3

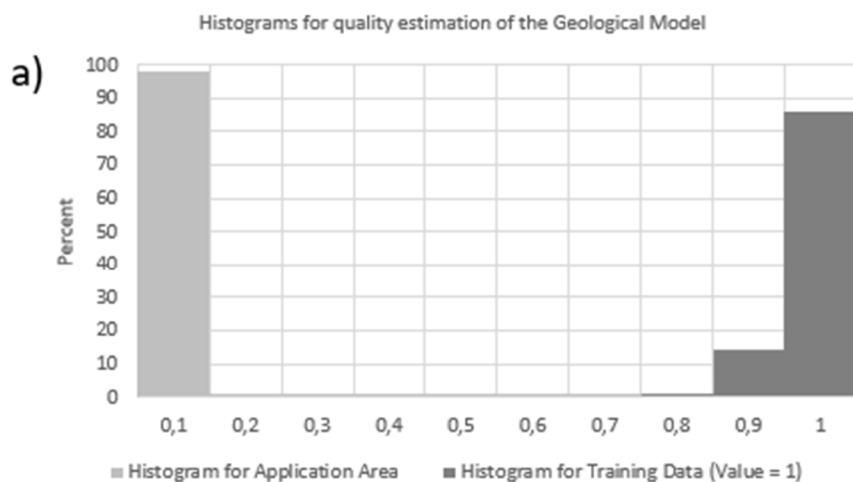

Histograms for the quality estimation of the Geological Model indicating that the ANN is able to identify >80% of the pixels in the training patterns with a scale better than 0.9, resulting in a reliable model.

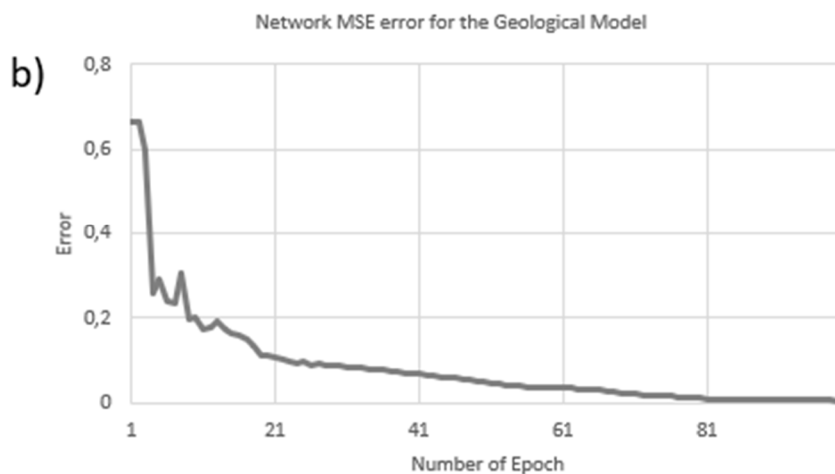

Network MSE error for the Geological Model indicating a stable ANN able to find correlations between the controlling parameters and the training data. The final Network MSE error is 0,0054175.

**Figure S3.** Histogram (a) and Network MSE error (b) for the Geological Model.

## Supplemental Figure S4

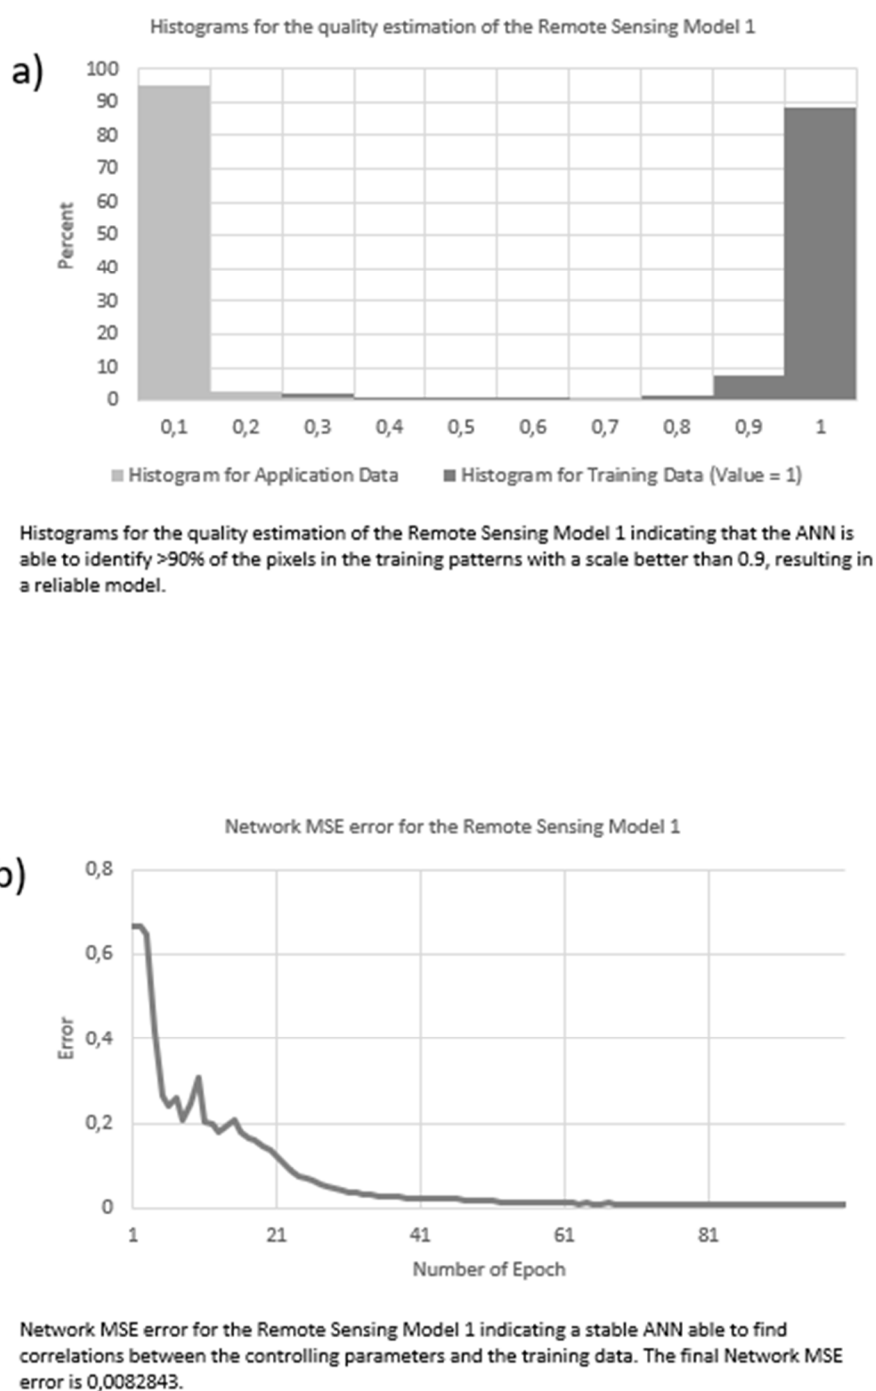

**Figure S4.** Histogram (a) and Network MSE error (b) for the Remote Sensing Model 1.

## Supplemental Figure S5

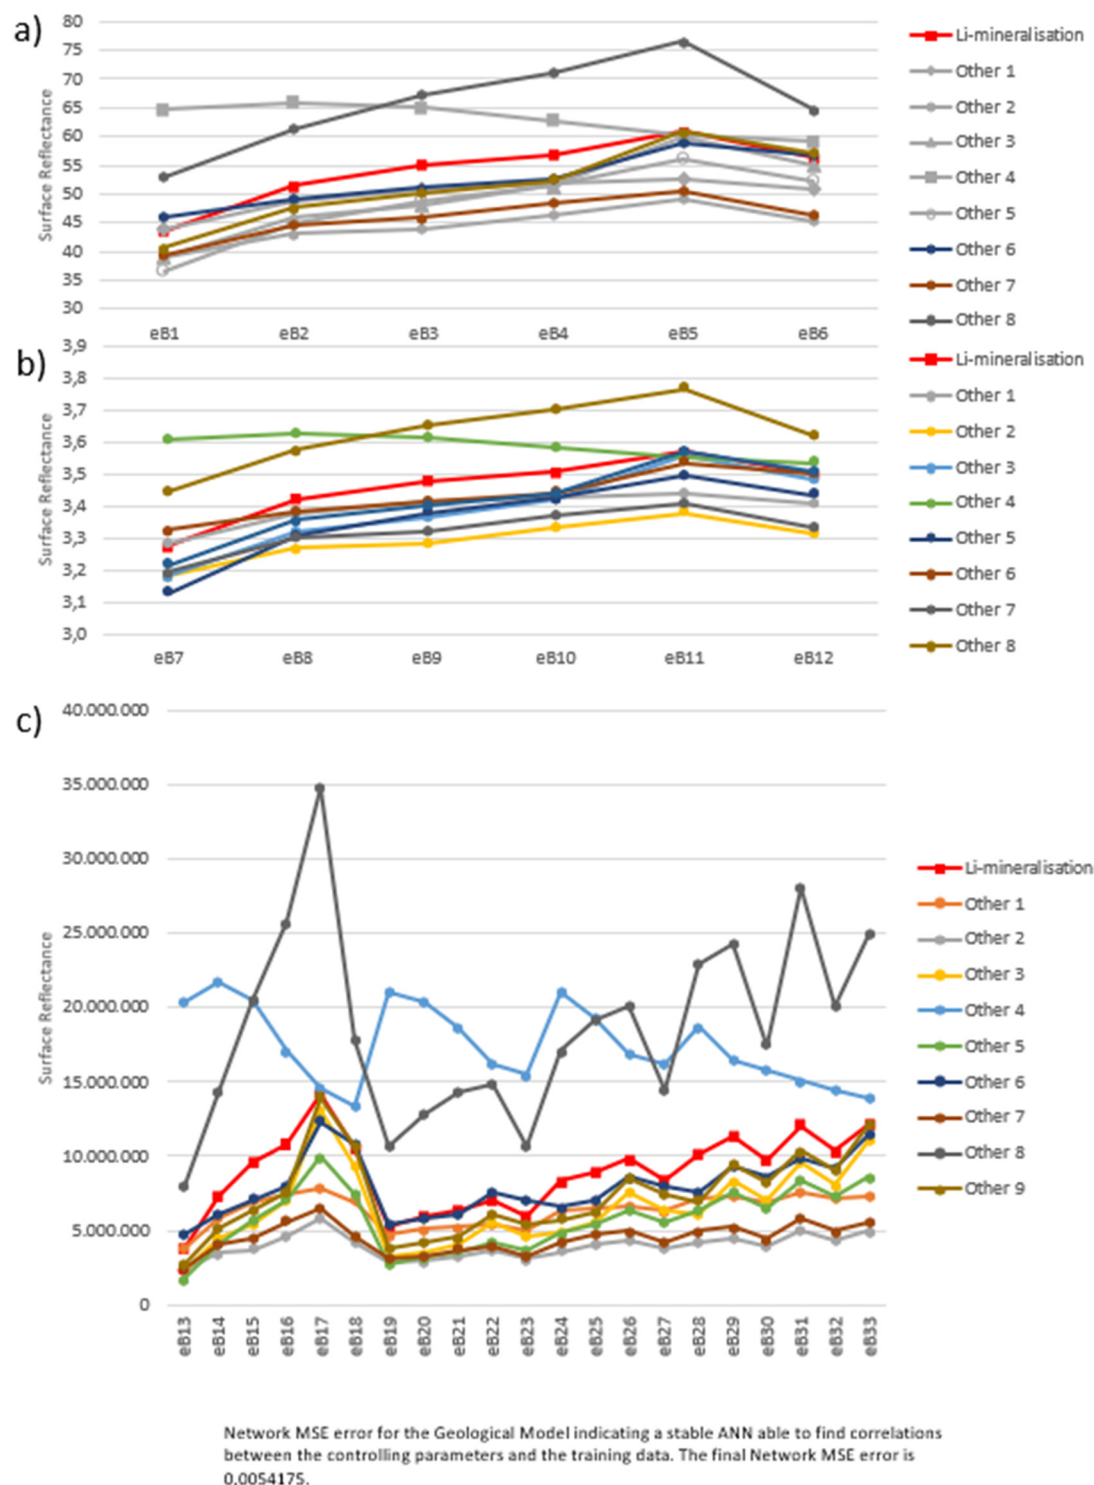

**Figure S5.** Spectral signatures for the extended spectral bands: (a) 1–6, (b) 7–12, (c) 13–32.

## Supplemental Figure S6

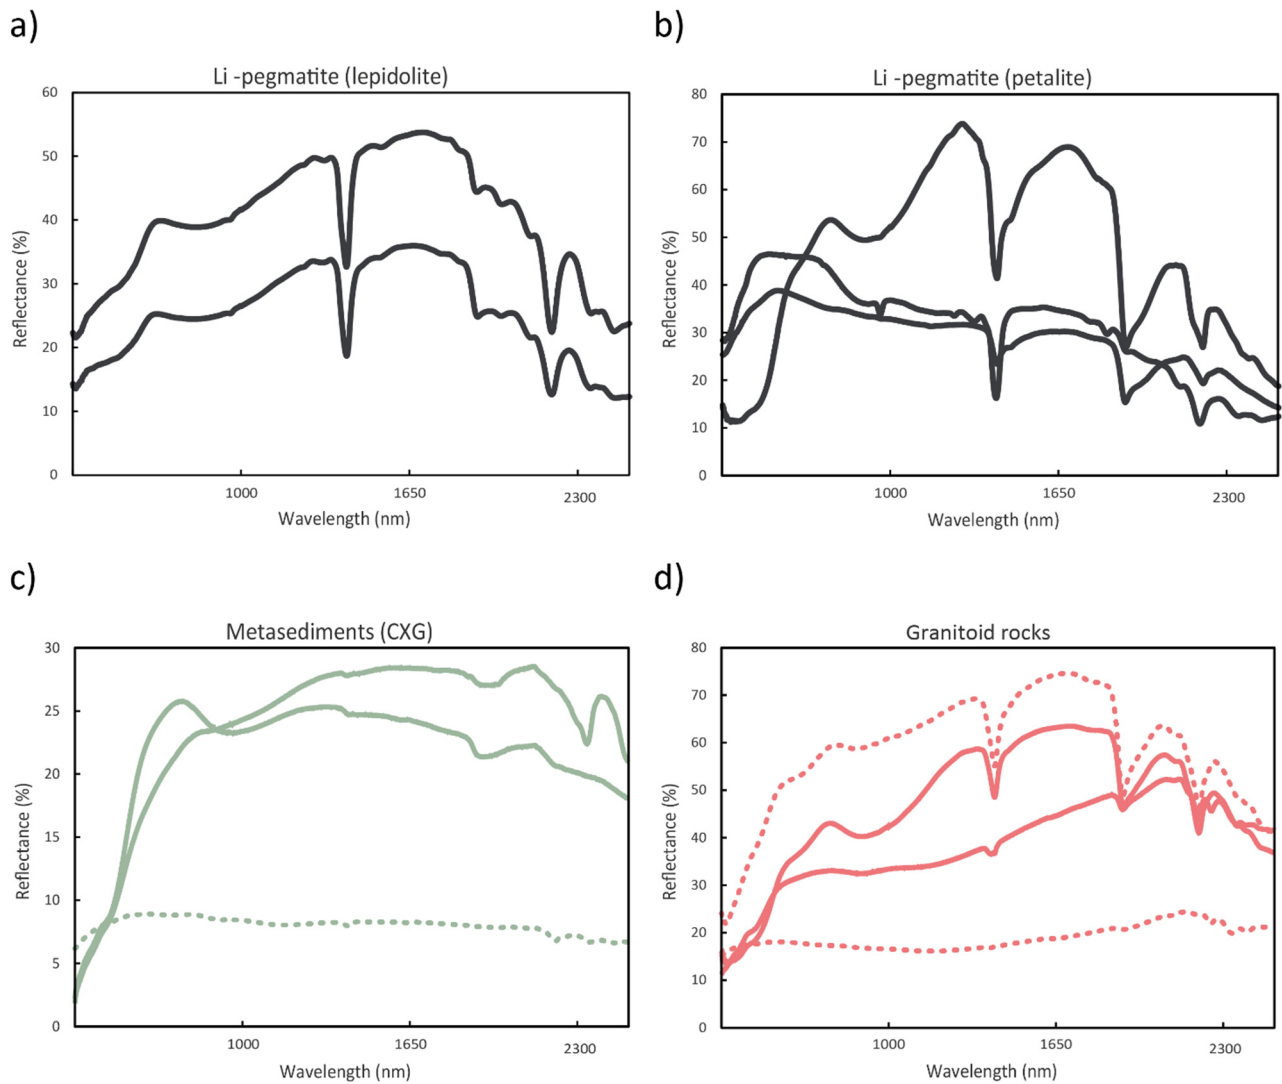

**Figure S6.** Reference spectral signatures of (a) lepidolite-bearing pegmatites, (b) petalite-bearing pegmatites (Bajoca mine), (c) schist-metagreywacke complex (CXG) metasediments, and (d) granitoid rocks [45]. Dotted curves correspond to fresh samples. Full curves represent weathered samples.

## Supplemental Figure S7

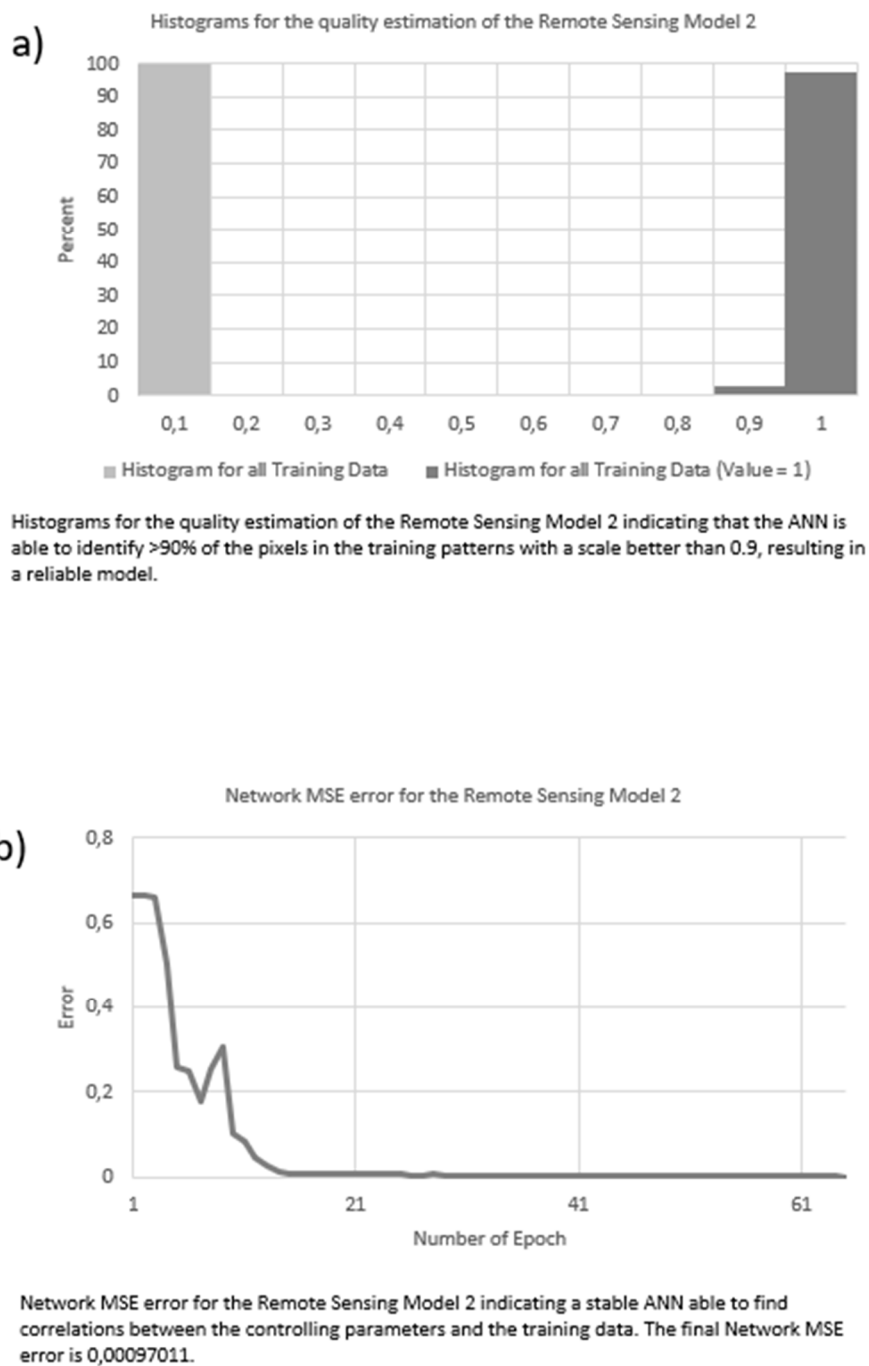

**Figure S7.** Histogram (a) and Network MSE error (b) for the Remote Sensing Model 2.
